# Supplementary material for: Novel Developmental Analyses Identify Longitudinal Patterns of Early Gut Microbiota that Affect Infant Growth
Source: PubMed Central journal article supplement (PMC3650000; doi:10.1371/journal.pcbi.1003042), 2013-05-09
Supplement: pcbi.1003042.s001.pdf [file pcbi.1003042.s001.pdf]

**Table S1. Probes and the frequency of their detection**

| #  | Probe match                                                                 | Female<br>Day 4 | Female<br>Day 10 | Female<br>Day 30 | Female<br>Day 120 | Male<br>Day 4 | Male<br>Day 10 | Male<br>Day 30 | Male<br>Day 120 |
|----|-----------------------------------------------------------------------------|-----------------|------------------|------------------|-------------------|---------------|----------------|----------------|-----------------|
| 1  | <i>Enterococcus</i> spp.                                                    | 56              | 51               | 54               | 66                | 64            | 51             | 54             | 62              |
| 2  | <i>Lactobacillus</i> spp.                                                   | 40              | 47               | 50               | 36                | 25            | 37             | 44             | 34              |
| 3  | <i>Lactobacillus paraca-</i><br><i>sei/casei</i>                            | 49              | 59               | 60               | 61                | 62            | 55             | 61             | 72              |
| 4  | <i>Staphylococcus</i> spp.                                                  | 91              | 98               | 84               | 60                | 96            | 94             | 83             | 58              |
| 5  | <i>Streptococcus</i> spp. ( $\alpha$ -<br>hemolytic)                        | 46              | 54               | 48               | 25                | 49            | 45             | 54             | 36              |
| 6  | <i>Clostridium</i> spp.                                                     | 42              | 42               | 43               | 55                | 40            | 40             | 48             | 69              |
| 7  | <i>Lachnospiraceae</i> spp.                                                 | 27              | 26               | 34               | 51                | 29            | 28             | 26             | 54              |
| 8  | <i>Veillonella</i> spp.                                                     | 30              | 52               | 68               | 67                | 28            | 48             | 71             | 66              |
| 9  | <i>Lachnospiraceae</i> spp.                                                 | 48              | 49               | 53               | 67                | 44            | 48             | 56             | 70              |
| 10 | <i>Lachnospiraceae</i> spp.                                                 | 48              | 49               | 59               | 75                | 53            | 60             | 62             | 72              |
| 11 | <i>Lachnospiraceae</i> spp.                                                 | 63              | 57               | 65               | 61                | 60            | 64             | 59             | 68              |
| 12 | <i>Pseudomonas</i> spp.                                                     | 68              | 71               | 70               | 57                | 71            | 72             | 66             | 64              |
| 13 | <i>Escherichia coli</i>                                                     | 62              | 63               | 60               | 80                | 63            | 67             | 66             | 72              |
| 14 | Enterobacteriaceae<br>other than <i>E. coli</i>                             | 75              | 81               | 81               | 88                | 86            | 89             | 82             | 89              |
| 15 | Gammaproteobacteria                                                         | 86              | 91               | 94               | 98                | 92            | 95             | 91             | 94              |
| 16 | <i>Varibaculum</i> spp.                                                     | 37              | 29               | 36               | 39                | 31            | 31             | 27             | 51              |
| 17 | <i>Bifidobacterium</i><br><i>longum</i> including<br>subsp. <i>infantis</i> | 84              | 81               | 80               | 84                | 84            | 84             | 83             | 87              |
| 18 | <i>Bifidobacterium bi-</i><br><i>fidum</i>                                  | 82              | 79               | 83               | 88                | 73            | 81             | 83             | 86              |
| 19 | <i>Bifidobacterium breve</i>                                                | 50              | 55               | 59               | 63                | 39            | 48             | 54             | 66              |
| 20 | <i>Bifidobacterium</i> spp.                                                 | 79              | 80               | 84               | 83                | 74            | 76             | 77             | 79              |
| 21 | <i>Bacteroides fragilis</i>                                                 | 35              | 30               | 35               | 31                | 29            | 27             | 30             | 19              |
| 22 | <i>Bacteroides</i> spp.                                                     | 68              | 47               | 63               | 61                | 52            | 47             | 48             | 45              |
|    | (Sample size)                                                               | 103             | 105              | 103              | 100               | 102           | 100            | 103            | 100             |

The frequency of the detection of each probe, stratified by sex and day. Information is presented as percent detected.
