# Supplementary material for: Novel Developmental Analyses Identify Longitudinal Patterns of Early Gut Microbiota that Affect Infant Growth
Source: PubMed Central journal article supplement (PMC3650000; doi:10.1371/journal.pcbi.1003042), 2013-05-09
Supplement: pcbi.1003042.s002.pdf [file pcbi.1003042.s002.pdf]

## Text S1

For  $k = 1, \dots, 22$  gut microbiota spp. groups with  $j = 1, \dots, 16$  patterns, let the p-values of the patterns  $j_{k,4}$ ,  $j_{k,4}$  without day 120 ( $j_{k,3}$ ),  $j_{k,4}$  without days 30 and 120 ( $j_{k,2}$ ), and  $j_{k,4}$  without days 10, 30, and 120 ( $j_{k,1}$ ), be denoted as  $P_{j_{k,4}}$ ,  $P_{j_{k,3}}$ ,  $P_{j_{k,2}}$ , and  $P_{j_{k,1}}$ , respectively (obtained using Tuke's method). These patterns are considered to be part of the pattern family  $j_k$ . We aim to test the following:

$$H_0 : \min (|\mu_{j_{k,4}}|, |\mu_{j_{k,3}}|, |\mu_{j_{k,2}}|, |\mu_{j_{k,1}}|) \geq 0.67$$

$$H_1 : \min (|\mu_{j_{k,4}}|, |\mu_{j_{k,3}}|, |\mu_{j_{k,2}}|, |\mu_{j_{k,1}}|) < 0.67$$

which corresponds to

$$H_0 : \{|\mu_{j_{k,4}}| \geq 0.67\} \cap \{|\mu_{j_{k,3}}| \geq 0.67\} \cap \{|\mu_{j_{k,2}}| \geq 0.67\} \cap \{|\mu_{j_{k,1}}| \geq 0.67\}$$

$$H_1 : \{|\mu_{j_{k,4}}| < 0.67\} \cup \{|\mu_{j_{k,3}}| < 0.67\} \cup \{|\mu_{j_{k,2}}| < 0.67\} \cup \{|\mu_{j_{k,1}}| < 0.67\}$$

Given an arbitrary significance level  $\alpha^*$ , the following procedures are performed after finding a four time point pattern  $j_{k,4}$  whose mean is significantly close to zero:

1. If  $P_{j_{k,4}} < \alpha^*/2$ , then  $j_{k,3}$  is tested at significance level  $\alpha^*/2$
2. If  $P_{j_{k,3}} < \alpha^*/3$ , then  $j_{k,2}$  is tested at significance level  $\alpha^*/3$
3. If  $P_{j_{k,2}} < \alpha^*/4$ , then  $j_{k,1}$  is tested at significance level  $\alpha^*/4$

The Bonferroni adjusted p-value for gut microbiota spp. group  $k$  is denoted as

$$P_k = (\text{num patterns tested in gut microbiota spp. group } k) \times \min_{j \in k} (P_{j_{k,4}})$$

Without loss of generality, we will prove that the FDR is controlled when step 1 is implemented - proofs for the other steps are similarly formed. This proof relies on the proof provided in Guo et al. (2010). We let  $V$  be the number of false positives,  $I_1 = \{1 \leq k \leq 22 | H_1\}$  be the set of indices of false null hypotheses,  $\alpha^* = \alpha \times R / (22 \times 16)$  (obtained from Guo et al., 2010), and  $I(\cdot)$  be an indicator function. We then

express  $V$  as:

$$\begin{aligned} V &= \sum_{k \in I_1} I(\cup_{j=1}^{16} (\text{Reject } H_0 \text{ for } j_k | H_0)) \\ &= \sum_{k \in I_1} I(\cup_{j=1}^{16} ((\alpha^*/2 \leq P_{j_{k,4}} \leq \alpha^* | H_0) + (P_{j_{k,4}} \leq \alpha^*/2, P_{j_{k,3}} \leq \alpha^*/2 | H_0))) \end{aligned}$$

Then

$$\begin{aligned} FDR &= E \left\{ \frac{V}{R \vee 1} \right\} \\ &= E \left\{ \frac{E(V | R = r)}{R \vee 1} \right\} \\ &= E \left[ \frac{\sum_{j \in I_1} \Pr \{ \cup_{j=1}^{16} ((\alpha^*/2 \leq P_{j_{k,4}} \leq \alpha^* | H_0) + (P_{j_{k,4}} \leq \alpha^*/2, P_{j_{k,3}} \leq \alpha^*/2 | H_0)) | R = r \}}{R \vee 1} \right] \\ &= \sum_{r=1}^{22} \sum_{k \in I_1} \frac{1}{r} \Pr \{ \cup_{j=1}^{16} ((\alpha^*/2 \leq P_{j_{k,4}} \leq \alpha^*, R = r | H_0) + (P_{j_{k,4}} \leq \alpha^*/2, P_{j_{k,3}} \leq \alpha^*/2, R = r | H_0)) \} \\ &\leq \sum_{r=1}^{22} \sum_{k \in I_1} \sum_{j=1}^{16} \frac{1}{r} \{ \Pr(\alpha^*/2 \leq P_{j_{k,4}} \leq \alpha^*, R = r | H_0) + \Pr(P_{j_{k,4}} \leq \alpha^*/2, P_{j_{k,3}} \leq \alpha^*/2, R = r | H_0) \} \end{aligned}$$

The above inequality follows from the Bonferroni inequality

$$\begin{aligned} &\leq \sum_{r=1}^{22} \sum_{k \in I_1} \sum_{j=1}^{16} \frac{1}{r} \{ \Pr(\alpha^*/2 \leq P_{j_{k,4}} \leq \alpha^*, R = r | H_0) + \\ &\quad \max(\Pr(P_{j_{k,4}} \leq \alpha^*/2, R = r | H_0), \Pr(P_{j_{k,3}} \leq \alpha^*/2, R = r | H_0)) \} \\ &= \sum_{r=1}^{22} \sum_{k \in I_1} \sum_{j=1}^{16} \frac{1}{r} \{ \Pr(\alpha^*/2 \leq P_{j_{k,4}} \leq \alpha^* | H_0) \times \Pr(R^{(-k)} = r - 1) + \\ &\quad \max(\Pr(P_{j_{k,4}} \leq \alpha^*/2 | H_0), \Pr(P_{j_{k,3}} \leq \alpha^*/2 | H_0)) \times \Pr(R^{(-k)} = r - 1) \} \end{aligned}$$

The above simplification results from the assumption that each gut microbiota spp. group

is independent of each other, where  $R^{(-k)}$  denotes the number of rejections in the step up procedure with critical constants  $a_l = \frac{l+1}{22}, l = 1, \dots, 22-1$  based on  $\{P_1, \dots, P_{22}\} \setminus \{P_k\}$

$$\leq \sum_{r=1}^{22} \sum_{k \in I_1} \sum_{j=1}^{16} \frac{1}{r} \left\{ \alpha^*/2 \times \Pr(R^{(-k)} = r - 1) + \max(\alpha^*/2, \alpha^*/2) \times \Pr(R^{(-k)} = r - 1) \right\}$$

The above inequality follows from  $\Pr(\text{pvalue} \leq p) \leq p$ , for any  $p \in (0, 1)$  under  $H_0$

$$\begin{aligned}
&= \sum_{r=1}^{22} \sum_{k \in I_1} \sum_{j=1}^{16} \frac{1}{r} \left\{ \alpha^* \times \Pr \left( R^{(-k)} = r - 1 \right) \right\} \\
&= \sum_{r=1}^{22} \sum_{k \in I_1} \sum_{j=1}^{16} \frac{1}{r} \left\{ \alpha \times R / (22 \times 16) \times \Pr \left( R^{(-k)} = r - 1 \right) \right\} \\
&= \frac{m_1}{22} \alpha \\
&\leq \alpha
\end{aligned}$$
